# Supplementary material for: Gender Differences in Association Between Serum Indirect Bilirubin and Chronic Kidney Disease Risk: A Prospective Cohort Study in Northwest China
Source: Research Square preprint supplement (doi:10.21203/rs.3.rs-7457824/v1), 2025-09-18
Supplement: Supplementary file 1 [file b0ceae48c15b3f2214576757.docx]

Table S1 Baseline characteristics in the male and female participants

| Variables | Male (n=15538) | Female (n=10146) | p |
| --- | --- | --- | --- |
| Age, n(%) |  |  | <0.001 |
| <45 | 7926 (51.0) | 5025 (49.5) |  |
| 45~59 | 4383 (28.2) | 3364 (33.2) |  |
| ≥60 | 3229 (20.8) | 1757 (17.3) |  |
| Occupation, n(%) |  |  | <0.001 |
| Worker staff | 12822 (82.5) | 7907 (77.9) |  |
| Managerial staff | 1633 (10.5) | 1257 (12.4) |  |
| Technical staff | 745 (4.8) | 308 (3.0) |  |
| Logistics staff | 338 (2.2) | 674 (6.6) |  |
| Education, n(%) |  |  | <0.001 |
| Junior middle school or below | 5850 (37.6) | 4427 (43.6) |  |
| Senior middle school or equivalent | 4539 (29.2) | 2640 (26.0) |  |
| College or above | 5149 (33.1) | 3079 (30.3) |  |
| Smoking status, n(%) |  |  | <0.001 |
| Never | 4068 (26.2) | 9979 (98.4) |  |
| Still | 9354 (60.2) | 136 (1.3) |  |
| Quit | 2116 (13.6) | 31 (0.3) |  |
| Alcohol consumption, n(%) |  |  | <0.001 |
| Never | 9303 (59.9) | 9878 (97.4) |  |
| Occasionally | 5131 (33.0) | 238 (2.4) |  |
| Regular | 1104 (7.1) | 30 (0.3) |  |
| Physical exercise, n(%) |  |  | <0.001 |
| Never | 1415 (9.1) | 915 (9.0) |  |
| Occasionally | 6777 (43.6) | 4143 (40.8) |  |
| Regular | 7346 (47.3) | 5088 (50.1) |  |
| High‐salt diet, n(%) | 4181 (26.9) | 1671 (16.5) | <0.001 |
| High‐fat diet, n(%) | 3538 (22.8) | 1439 (14.2) | <0.001 |
| High‐sugar diet, n(%) | 3058 (19.7) | 2117 (20.9) | 0.022 |
| Hypertension, n(%) | 4739 (30.5) | 2295 (22.6) | <0.001 |
| Diabetes, n(%) | 1305 (8.4) | 536 (5.3) | <0.001 |
| Hyperuricemia, n(%) | 2867 (18.5) | 140 (1.4) | <0.001 |
| Dyslipidemia, n(%) | 6734 (43.3) | 2578 (25.4) | <0.001 |
| BMI(kg/m2), n(%) |  |  | <0.001 |
| <18.5 | 7320 (47.1) | 6307 (62.2) |  |
| 18.5~23.9 | 512 (3.3) | 690 (6.8) |  |
| 24~27.9 | 6138 (39.5) | 2443 (24.1) |  |
| ≥28 | 1568 (10.1) | 706 (7.0) |  |
| SUA, μmol/L | 353.0 (310.0, 402.0) | 264.0 (229.0, 302.0) | <0.001 |
| SCR, μmol/L | 75.0 (68.0, 82.0) | 58.0 (53.0, 64.0) | <0.001 |
| ALT, U/L | 32.0 (23.0, 47.0) | 21.0 (16.0, 29.0) | <0.001 |
| AST, U/L | 33.0 (28.0, 40.0) | 29.0 (24.0, 35.0) | <0.001 |
| TC, mmol/L | 4.6 (4.1, 5.2) | 4.70 (4.1, 5.3) | <0.001 |
| TG, mmol/L | 1.7 (1.2, 2.6) | 1.3 (0.9, 1.9) | <0.001 |
| HDL-C, mmol/L | 1.3 (1.1, 1.5) | 1.5 (1.3, 1.7) | <0.001 |
| LDL-C, mmol/L | 3.0 (2.5, 3.5) | 3.1 (2.6, 3.6) | <0.001 |
| SBP, mmHg | 125.0 (113.0, 136.0) | 117.0 (105.0, 131.0) | <0.001 |
| DBP, mmHg | 79.0 (71.0, 87.0) | 75.0 (68.0, 84.0) | <0.001 |
| FPG, mmol/L | 5.1 (4.7, 5.6) | 5.0 (4.7, 5.4) | <0.001 |
| ALP, U/L | 69.0 (58.0, 82.0) | 59.0 (48.0, 73.0) | <0.001 |
| eGFR, mL/min/1.73m2 | 104.0 (94.2, 112.0) | 106.0 (95.7, 113.0) | <0.001 |
| jian | 11.4 (9.0, 14.4) | 11.1 (9.0, 13.7) | <0.001 |
| CKD, n(%) | 906 (5.83) | 313 (3.08) | <0.001 |

Abbreviations: BMI, body mass index; SUA, serum uric acid; Scr, serum creatinine; ALT, alanine aminotransferase; AST, aspartate aminotransferase; TC, total cholesterol; TG, triglyceride; HDL‐C, high‐density lipoprotein cholesterol; LDL-C, low‐density lipoprotein cholesterol; SBP, systolic blood pressure; DBP, diastolic blood pressure; FPG, fasting plasma glucose; ALP, alkaline phosphatase; eGFR, estimated glomerular filtration rate; CKD, chronic kidney disease.

Table S2 The CKD morbidity status of subjects with varying baseline characteristics

| Variables | Total (N=25684) | | | Males (N=15538) | | | Females (N=10146) | | |
| --- | --- | --- | --- | --- | --- | --- | --- | --- | --- |
| n | N | Inc (%) | n | N | Inc (%) | n | N | Inc (%) |
| Age |  |  |  |  |  |  |  |  |  |
| ＜45 | 479 | 12951 | 3.70 | 358 | 7926 | 4.52 | 121 | 5025 | 2.41 |
| 45-59 | 330 | 7747 | 4.26 | 233 | 4383 | 5.32 | 97 | 3364 | 2.88 |
| ≥60 | 410 | 4986 | 8.22a | 315 | 3229 | 9.76a | 95 | 1757 | 5.41a |
| Occupation |  |  |  |  |  |  |  |  |  |
| Worker staff | 1017 | 20729 | 4.91 | 769 | 12822 | 6.00 | 248 | 7907 | 3.14 |
| Managerial staff | 106 | 2890 | 3.67 | 74 | 1633 | 4.53 | 32 | 1257 | 2.55 |
| Technical staff | 41 | 1053 | 3.89 | 34 | 745 | 4.56 | 7 | 308 | 2.27 |
| Logistics staff | 55 | 1012 | 5.43a | 29 | 338 | 8.58a | 26 | 674 | 3.86 |
| Education |  |  |  |  |  |  |  |  |  |
| Junior middle school or below | 624 | 10277 | 6.07 | 456 | 5850 | 7.79 | 168 | 4427 | 3.79 |
| Senior middle school or equivalent | 329 | 7179 | 4.58 | 253 | 4539 | 5.57 | 76 | 2640 | 2.88 |
| College or above | 266 | 8228 | 3.23 | 197 | 5149 | 3.83 | 69 | 3079 | 2.24 |
| Income |  |  |  |  |  |  |  |  |  |
| <¥1000 | 74 | 1214 | 6.10 | 70 | 1051 | 6.66 | 4 | 163 | 2.45 |
| ¥1000~¥1999 | 614 | 12254 | 5.01 | 480 | 7516 | 6.39 | 134 | 4738 | 2.83 |
| ¥2000~¥4999 | 514 | 11859 | 4.33 | 346 | 6769 | 5.11 | 168 | 5090 | 3.30 |
| ¥5000~¥9999 | 15 | 322 | 4.66 | 9 | 179 | 5.03 | 6 | 143 | 4.20 |
| ≥¥10000 | 2 | 35 | 5.71a | 1 | 23 | 4.35a | 1 | 12 | 8.33 |
| Smoking status |  |  |  |  |  |  |  |  |  |
| Never | 523 | 14047 | 3.72 | 216 | 4068 | 5.31 | 307 | 9979 | 3.08 |
| Still | 516 | 9490 | 5.44 | 510 | 9354 | 5.45 | 6 | 136 | 4.41 |
| Quit | 180 | 2147 | 8.38a | 180 | 2116 | 8.51a | 0 | 31 | 0.00 |
| Alcohol consumption |  |  |  |  |  |  |  |  |  |
| Never | 792 | 19181 | 4.13 | 488 | 9303 | 5.25 | 304 | 9878 | 3.08 |
| Occasionally | 321 | 5369 | 5.98 | 312 | 5131 | 6.08 | 9 | 238 | 3.78 |
| Regular | 106 | 1134 | 9.35a | 106 | 1104 | 9.60a | 0 | 30 | 0.00 |
| Physical exercise |  |  |  |  |  |  |  |  |  |
| Never | 140 | 2330 | 6.01 | 110 | 1415 | 7.77 | 30 | 915 | 3.28 |
| Occasionally | 500 | 10920 | 4.58 | 369 | 6777 | 5.44 | 131 | 4143 | 3.16 |
| Regular | 579 | 12434 | 4.66a | 427 | 7346 | 5.81a | 152 | 5088 | 2.99 |
| Hypertension |  |  |  |  |  |  |  |  |  |
| No | 604 | 18650 | 3.24 | 426 | 10799 | 3.94 | 178 | 7851 | 2.27 |
| Yes | 615 | 7034 | 8.74a | 480 | 4739 | 10.13a | 135 | 2295 | 5.88a |
| Diabetes |  |  |  |  |  |  |  |  |  |
| No | 1078 | 24655 | 4.37 | 790 | 14839 | 5.32 | 288 | 9816 | 2.93 |
| Yes | 141 | 1029 | 13.70a | 116 | 699 | 16.60a | 25 | 330 | 7.58a |
| Hyperuricemia |  |  |  |  |  |  |  |  |  |
| No | 984 | 22677 | 4.34 | 683 | 12671 | 5.39 | 301 | 10006 | 3.01 |
| Yes | 235 | 3007 | 7.82a | 223 | 2867 | 7.78a | 12 | 140 | 8.57a |
| Dyslipidemia |  |  |  |  |  |  |  |  |  |
| No | 626 | 16372 | 3.82 | 426 | 8804 | 4.84 | 200 | 7568 | 2.64 |
| Yes | 593 | 9312 | 6.37a | 480 | 6734 | 7.13a | 113 | 2578 | 4.38a |
| High‐salt diet |  |  |  |  |  |  |  |  |  |
| No | 936 | 19832 | 4.72 | 675 | 11357 | 5.94 | 261 | 8475 | 3.08 |
| Yes | 283 | 5852 | 4.84 | 231 | 4181 | 5.52 | 52 | 1671 | 3.11 |
| High‐fat diet |  |  |  |  |  |  |  |  |  |
| No | 972 | 20707 | 4.69 | 696 | 12000 | 5.80 | 276 | 8707 | 3.17 |
| Yes | 247 | 4977 | 4.96 | 210 | 3538 | 5.94 | 37 | 1439 | 2.57 |
| High‐sugar diet |  |  |  |  |  |  |  |  |  |
| No | 987 | 20509 | 4.81 | 748 | 12480 | 5.99 | 239 | 8029 | 2.98 |
| Yes | 232 | 5157 | 4.50 | 158 | 3058 | 5.17 | 74 | 2117 | 3.50 |
| BMI(kg/m2) |  |  |  |  |  |  |  |  |  |
| ＜18.5 | 39 | 1202 | 3.24 | 25 | 512 | 4.88 | 14 | 690 | 2.03 |
| 18.5-23.9 | 496 | 13627 | 3.64 | 345 | 7320 | 4.71 | 151 | 6307 | 2.39 |
| 24-27.9 | 485 | 8581 | 5.65 | 385 | 6138 | 6.27 | 100 | 2443 | 4.09 |
| ≥28 | 199 | 2274 | 8.75a | 151 | 1568 | 9.63a | 48 | 706 | 6.80a |

Note: N, the total number of the participants; n, the number of incidence cases; Inc, the incidence rate; a, p < 0.05 when comparing cumulative incidence rates within each subgroup. Abbreviation: BMI, body mass index.

Table S3 Standardized mean differences of variables after PSM

| Variables | SMDs | Variables | SMDs | Variables | SMDs |
| --- | --- | --- | --- | --- | --- |
| Age | 0.011 | Hypertension | 0.017 | TC | 0.006 |
| Occupation | 0.010 | Diabetes | 0.003 | TG | 0.004 |
| Education | 0.013 | Hyperuricemia | 0.004 | HDLC | 0.007 |
| Smoking status | 0.012 | Dyslipidemia | 0.011 | LDLC | 0.014 |
| Alcohol consumption | 0.005 | BMI | 0.010 | SBP | 0.014 |
| Physical exercise | 0.015 | SUA | 0.016 | DBP | 0.006 |
| High‐salt diet | 0.002 | Scr | 0.014 | FPG | 0.007 |
| High‐fat diet | 0.006 | ALT | 0.005 | ALP | 0.004 |
| High‐sugar diet | 0.008 | AST | 0.004 | e-GFR | 0.013 |

Note: The abbreviations are the same as in Table S1.

Table S4 Baseline characteristics between the two groups with serum IBIL levels of ≥11.4 μmol/L and <11.4 μmol/L

| Variables | Before PSM | | | After PSM | | |
| --- | --- | --- | --- | --- | --- | --- |
| IBIL<11.4 μmol/L  (n=13021) | IBIL≥11.4 μmol/L  (n=12663) | *p* | IBIL<11.4 μmol/L  (n=8753) | IBIL≥11.4 μmol/L  (n=8753) | *p* |
| age | 44.0 (38.0, 55.0) | 45.0 (39.0, 56.0) | <0.001 | 44.0 (38.0, 56.0) | 44.0 (39.0, 54.0) | 0.845 |
| Occupation, n(%) |  |  | 0.774 |  |  | 0.927 |
| Worker staff | 10530 (80.9) | 10199 (80.5) |  | 7040 (80.4) | 7064 (80.7) |  |
| Managerial staff | 1465 (11.3) | 1425 (11.3) |  | 997 (11.4) | 969 (11.1) |  |
| Technical staff | 528 (4.1) | 525 (4.2) |  | 355 (4.1) | 359 (4.1) |  |
| Logistics staff | 498 (3.82) | 514 (4.06) |  | 361 (4.12) | 361 (4.12) |  |
| Education, n(%) |  |  | <0.001 |  |  | 0.690 |
| Junior middle school or below | 5170 (39.7) | 5107 (40.3) |  | 3514 (40.1) | 3543 (40.5) |  |
| Senior middle school or equivalent | 3539 (27.2) | 3640 (28.7) |  | 2456 (28.1) | 2405 (27.5) |  |
| College or above | 4312 (33.1) | 3916 (30.9) |  | 2783 (31.8) | 2805 (32.0) |  |
| Smoking status, n(%) |  |  | <0.001 |  |  | 0.736 |
| Never | 6823 (52.4) | 7224 (57.0) |  | 4761 (54.4) | 4806 (54.9) |  |
| Still | 5267 (40.5) | 4223 (33.3) |  | 3277 (37.4) | 3253 (37.2) |  |
| Quit | 931 (7.2) | 1216 (9.6) |  | 715 (8.2) | 694 (7.9) |  |
| Alcohol consumption, n(%) |  |  | <0.001 |  |  | 0.949 |
| Never | 9866 (75.8) | 9315 (73.6) |  | 6601 (75.4) | 6618 (75.6) |  |
| Occasionally | 2572 (19.8) | 2797 (22.1) |  | 1772 (20.2) | 1761 (20.1) |  |
| Regular | 583 (4.5) | 551 (4.4) |  | 380 (4.3) | 374 (4.3) |  |
| Physical exercise, n(%) |  |  | <0.001 |  |  | 0.620 |
| Never | 1284 (9.9) | 1046 (8.3) |  | 780 (8.9) | 791 (9.0) |  |
| Occasionally | 5783 (44.4) | 5137 (40.6) |  | 3779 (43.2) | 3715 (42.4) |  |
| Regular | 5954 (45.7) | 6480 (51.2) |  | 4194 (47.9) | 4247 (48.5) |  |
| High‐salt diet, n(%) | 3056 (23.5) | 2796 (22.1) | 0.008 | 1998 (22.8) | 1990 (22.7) | 0.900 |
| High‐fat diet, n(%) | 2623 (20.1) | 2354 (18.6) | 0.002 | 1676 (19.1) | 1696 (19.4) | 0.716 |
| High‐sugar diet, n(%) | 2659 (20.4) | 2516 (19.9) | 0.277 | 1762 (20.1) | 1790 (20.5) | 0.612 |
| Hypertension, n(%) | 3497 (26.9) | 3537 (27.9) | 0.055 | 2391 (27.3) | 2326 (26.6) | 0.276 |
| Diabetes, n(%) | 948 (7.3) | 893 (7.1) | 0.493 | 609 (7.0) | 602 (6.9) | 0.858 |
| Hyperuricemia, n(%) | 1473 (11.3) | 1534 (12.1) | 0.048 | 1012 (11.6) | 981 (11.2) | 0.475 |
| Dyslipidemia, n(%) | 4602 (35.3) | 4710 (37.2) | 0.002 | 3094 (35.3) | 3112 (35.6) | 0.788 |
| BMI(kg/m2), n(%) |  |  | 0.002 |  |  | 0.927 |
| <18.5 | 6882 (52.9) | 6745 (53.3) |  | 4668 (53.3) | 4681 (53.5) |  |
| 18.5~23.9 | 593 (4.6) | 609 (4.8) |  | 410 (4.7) | 420 (4.8) |  |
| 24~27.9 | 4306 (33.1) | 4275 (33.8) |  | 2915 (33.3) | 2914 (33.3) |  |
| ≥28 | 1240 (9.5) | 1034 (8.2) |  | 760 (8.7) | 738 (8.4) |  |
| SUA | 315.0 (264.0, 373.0) | 319.0 (265.0, 377.0) | 0.004 | 316.0 (263.0, 373.0) | 315.0 (261.0, 373.0) | 0.266 |
| Scr | 68.0 (59.0, 77.0) | 69.0 (60.0, 78.0) | <0.001 | 68.0 (59.0, 77.0) | 68.0 (59.0, 77.0) | 0.445 |
| ALT | 26.0 (19.0, 39.0) | 28.0 (20.0, 41.0) | <0.001 | 27.0 (19.0, 40.0) | 27.0 (20.0, 40.0) | 0.147 |
| AST | 31.0 (26.0, 38.0) | 32.0 (26.0, 39.0) | <0.001 | 31.0 (26.0, 38.0) | 31.0 (26.0, 38.0) | 0.575 |
| TC | 4.5 (4.0, 5.1) | 4.7 (4.2, 5.3) | <0.001 | 4.6 (4.1, 5.2) | 4.6 (4.1, 5.2) | 0.862 |
| TG | 1.5 (1.1, 2.2) | 1.6 (1.1, 2.3) | <0.001 | 1.5 (1.1, 2.2) | 1.6 (1.1, 2.3) | 0.086 |
| HDLC | 1.3 (1.1, 1.5) | 1.4 (1.1, 1.6) | <0.001 | 1.3 (1.1, 1.6) | 1.3 (1.1, 1.6) | 0.654 |
| LDLC | 3.0 (2.5, 3.5) | 3.1 (2.6, 3.5) | <0.001 | 3.0 (2.6, 3.5) | 3.0 (2.6, 3.5) | 0.538 |
| SBP | 122.0 (109.0, 134.0) | 122.0 (110.0, 135.0) | <0.001 | 122.0 (109.0, 134.0) | 121.0 (110.0, 134.0) | 0.386 |
| DBP | 77.0 (69.0, 86.0) | 78.0 (70.0, 86.0) | <0.001 | 77.0 (70.0, 86.0) | 77.0 (70.0, 86.0) | 0.806 |
| FPG | 5.1 (4.7, 5.5) | 5.1 (4.7, 5.5) | 0.363 | 5.1 (4.7, 5.5) | 5.0 (4.7, 5.5) | 0.004 |
| ALP | 66.0 (54.0, 80.0) | 65.0 (54.0, 78.0) | <0.001 | 65.0 (54.0, 79.0) | 65.0 (54.0, 79.0) | 0.415 |
| e-GFR | 105 (95.3, 113) | 104 (94.2, 112) | <0.001 | 105 (94.6, 113) | 105 (95.4, 112) | 0.509 |

Note: The abbreviations are the same as in Table S1.

Table S5 Association between serum IBIL levels and CKD in the total, male and female participants after propensity score matching treatment

| Variables | Ranges (within-group median), μmol/L | HRs (95% CI) | P |
| --- | --- | --- | --- |
| Total | P for trend = 0.041 | | |
| Q1 | ≤9.1 (7.8) | 1.000 (Reference) |  |
| Q2 | 9.1 ~ 11.3 (10.3) | 0.780 (0.643 ~ 0.946) | 0.012 |
| Q3 | 11.3 ~ 14.0 (12.6) | 0.844 (0.698 ~ 1.021) | 0.080 |
| Q4 | >14.0 (16.5) | 0.788 (0.650 ~ 0.954) | 0.015 |
| Per SD |  | 0.934 (0.871 ~ 1.001) | 0.053 |
| Male | P for trend = 0.016 | | |
| Q1 | ≤9.1 (7.7) | 1.000 (Reference) |  |
| Q2 | 9.1 ~ 11.3 (10.3) | 0.735 (0.587 ~ 0.920) | 0.007 |
| Q3 | 11.3 ~ 14.2 (12.7) | 0.778 (0.624 ~ 0.970) | 0.026 |
| Q4 | >14.2 (16.7) | 0.732 (0.585 ~ 0.917) | 0.007 |
| Per SD |  | 0.904 (0.832 ~ 0.983) | 0.018 |
| Female | P for trend = 0.707 | | |
| Q1 | ≤9.2 (7.9) | 1.000 (Reference) |  |
| Q2 | 9.2 ~ 11.4 (10.4) | 0.898 (0.610 ~ 1.320) | 0.583 |
| Q3 | 11.4 ~ 13.8 (12.5) | 1.029 (0.708 ~ 1.494) | 0.883 |
| Q4 | >13.8 (16.2) | 1.035 (0.712 ~ 1.504) | 0.856 |
| Per SD |  | 1.018 (0.891 ~ 1.162) | 0.793 |

Note: The models were adjusted for age, occupation, education, income, smoking status, alcohol consumption, physical exercise, high-salt diet, high-fat diet, high-sugar diet, BMI, baseline eGFR, hypertension, diabetes, hyperuricemia, dyslipidemia, SUA, SCR, ALT, AST, TC, TG, H-DLC, and L-DLC.


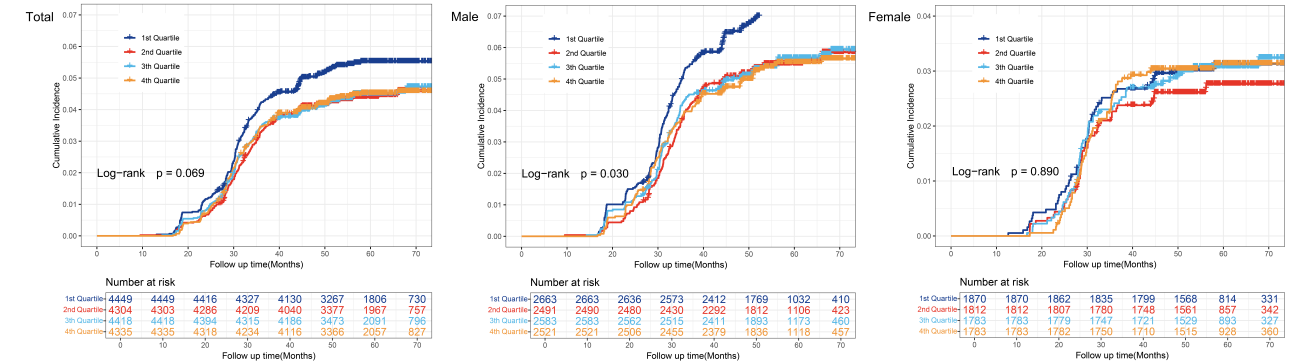


Figure S1 Cumulative incidence of CKD by quartile of serum IBIL concentration

Note: In this figure, the x-axis showed the follow-up time in months, and the y-axis showed the cumulative incidence of serum IBLI in different quartiles. Comparisons of differences among groups in the cumulative incidence of serum IBIL in different quartiles were based on the lowest quartile, which served as the reference point for comparison.


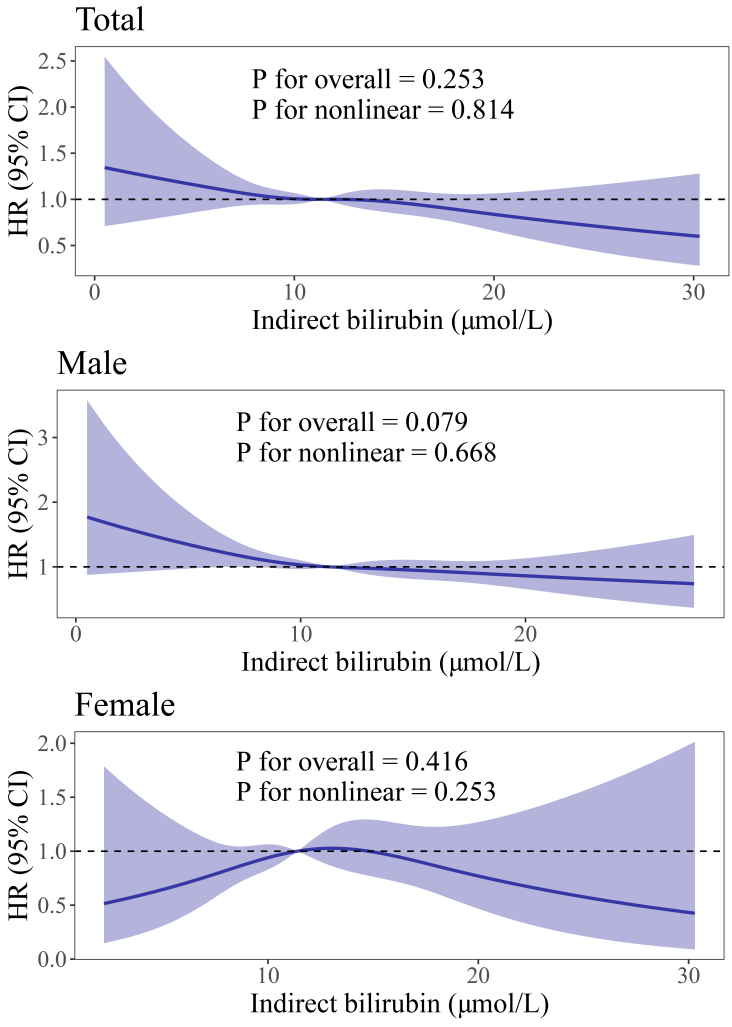


Figure S2 Dose-response relationships between serum IBIL levels and risk of CKD in the total, male and female participants after PSM

Note: Restricted cubic spine with 4 knots was performed to determine the serum IBIL and CKD dose-response relationship. In this figure, the solid blue lines indicated the adjusted HRs, and the blue shaded areas represented 95% CIs for HRs; the x-axes showed the level of serum IBIL, and the y-axes showed the HRs for CKD. The adjusted confounders are identical to those utilized in Model 4 of the Cox proportional hazards model.


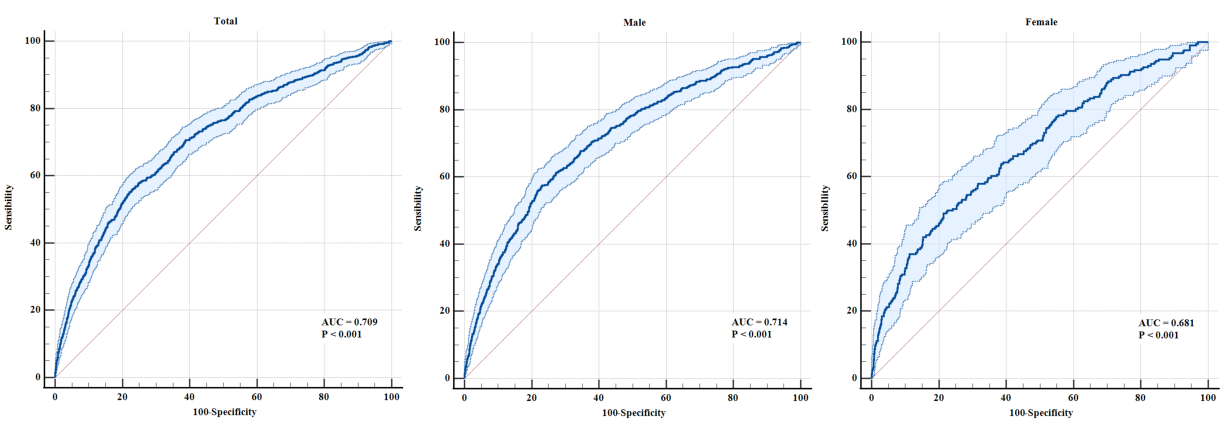


Figure S3 Receiver operator characteristic curves between serum IBIL and CKD after PSM

Note: Model adjusted for age, occupation, education, income, smoking status, alcohol consumption, physical exercise, high-salt diet, high-fat diet, high-sugar diet, BMI, baseline eGFR, hypertension, diabetes, hyperuricemia, dyslipidemia, SUA, SCR, ALT, AST, TC, TG, H-DLC, and L-DLC.

Table S6 The AUC, sensitivity, and specificity of serum IBIL for CKD after PSM

|  | AUC (95% CIs) | P | Sensitivity (%) | Specificity (%) | Youden's index |
| --- | --- | --- | --- | --- | --- |
| Total | 0.709 (0.702 ~ 0.716) | <0.001 | 56.24 | 76.75 | 0.330 |
| Male | 0.714 (0.705 ~ 0.723) | <0.001 | 57.50 | 76.81 | 0.343 |
| Female | 0.681 (0.670 ~ 0.691) | <0.001 | 49.07 | 78.54 | 0.276 |
